# Supplementary material
Source: PubMed Central journal article supplement (PMC3737316)

## **Supplemental Material to:**

**Megan Y. Murray, Stuart A. Rushworth, Lyubov Zaitseva,  
Kristian M. Bowles and David J. MacEwan**

**Attenuation of dexamethasone-induced cell death in  
multiple myeloma is mediated by miR-125b expression**

**Cell Cycle 2013; 12(13)**

**<http://dx.doi.org/10.4161/cc.25251>**

**<http://www.landesbioscience.com/journals/cc/article/25251>**

**A**

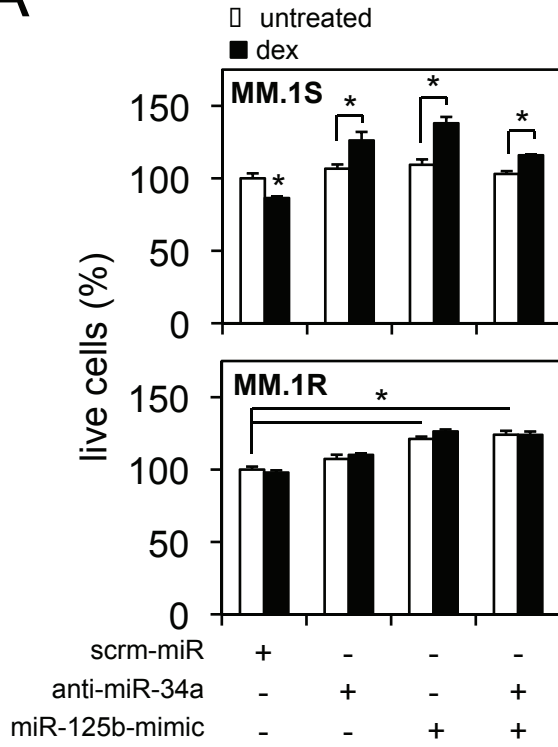

**B**

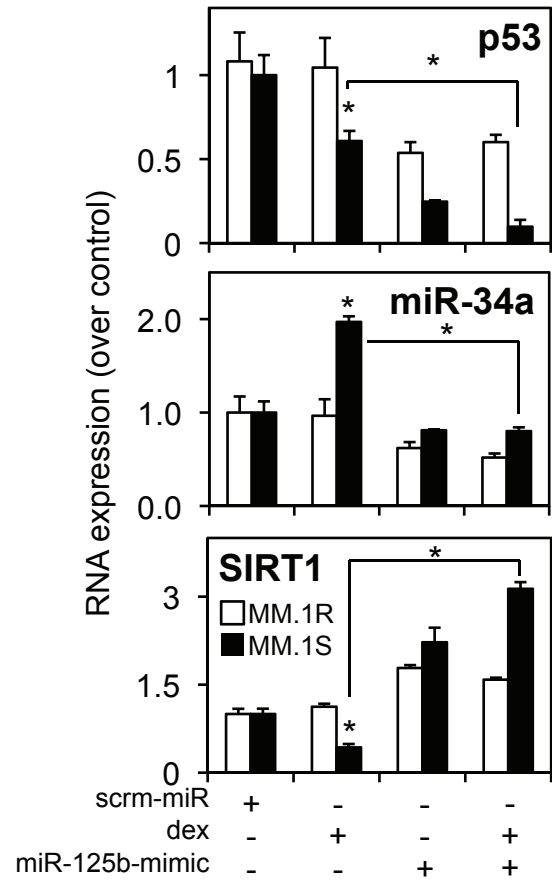

Supplement: cc-12-2144-s01.pdf [file cc-12-2144-s01.pdf]
